# Supplementary material for: Computational identification of co-evolving multi-gene modules in microbial biosynthetic gene clusters
Source: PubMed Central journal article supplement (PMC6395733; doi:10.1038/s42003-019-0333-6), 2019-02-28
Supplement: 42003_2019_333_MOESM8_ESM.pdf [file 42003_2019_333_MOESM8_ESM.pdf]

## Reporting Summary

Nature Research wishes to improve the reproducibility of the work that we publish. This form provides structure for consistency and transparency in reporting. For further information on Nature Research policies, see [Authors & Referees](#) and the [Editorial Policy Checklist](#).

### Statistics

For all statistical analyses, confirm that the following items are present in the figure legend, table legend, main text, or Methods section.

n/a Confirmed

- The exact sample size ( $n$ ) for each experimental group/condition, given as a discrete number and unit of measurement
- A statement on whether measurements were taken from distinct samples or whether the same sample was measured repeatedly
- The statistical test(s) used AND whether they are one- or two-sided  
*Only common tests should be described solely by name; describe more complex techniques in the Methods section.*
- A description of all covariates tested
- A description of any assumptions or corrections, such as tests of normality and adjustment for multiple comparisons
- A full description of the statistical parameters including central tendency (e.g. means) or other basic estimates (e.g. regression coefficient) AND variation (e.g. standard deviation) or associated estimates of uncertainty (e.g. confidence intervals)
- For null hypothesis testing, the test statistic (e.g.  $F$ ,  $t$ ,  $r$ ) with confidence intervals, effect sizes, degrees of freedom and  $P$  value noted  
*Give  $P$  values as exact values whenever suitable.*
- For Bayesian analysis, information on the choice of priors and Markov chain Monte Carlo settings
- For hierarchical and complex designs, identification of the appropriate level for tests and full reporting of outcomes
- Estimates of effect sizes (e.g. Cohen's  $d$ , Pearson's  $r$ ), indicating how they were calculated

*Our web collection on [statistics for biologists](#) contains articles on many of the points above.*

### Software and code

Policy information about [availability of computer code](#)

Data collection

All the available bacterial and fungal genomic sequences were obtained from GenBank (access date 08 October 2012). We used antiSMASH version 1.0 to detect all BGCs in this set of genomes, resulting in a collection of 482,040 genes in 14,869 biosynthetic gene clusters.

Data analysis

We analysed the dataset with ClusterFinder to obtain the most probable cluster borders. A set of Specialised Metabolite Clusters of Orthologous Groups (smCOGs) was constructed from all genes in the set of BGCs using the orthoMCL package with standard settings. All remaining analysis relied on custom code, which is described in detail in the manuscript and is available at available at [https://github.com/francescodc87/Modules\\_Detection](https://github.com/francescodc87/Modules_Detection)

For manuscripts utilizing custom algorithms or software that are central to the research but not yet described in published literature, software must be made available to editors/reviewers. We strongly encourage code deposition in a community repository (e.g. GitHub). See the Nature Research [guidelines for submitting code & software](#) for further information.

### Data

Policy information about [availability of data](#)

All manuscripts must include a [data availability statement](#). This statement should provide the following information, where applicable:

- Accession codes, unique identifiers, or web links for publicly available datasets
- A list of figures that have associated raw data
- A description of any restrictions on data availability

The complete dataset is available at <https://github.com/francescodc87/Modules-explorer> together with a Shiny-based web application which provides users with a simple graphical interface to explore the dataset containing all the detected modules.

## Field-specific reporting

Please select the one below that is the best fit for your research. If you are not sure, read the appropriate sections before making your selection.

Life sciences       Behavioural & social sciences       Ecological, evolutionary & environmental sciences

For a reference copy of the document with all sections, see [nature.com/documents/nr-reporting-summary-flat.pdf](https://www.nature.com/documents/nr-reporting-summary-flat.pdf)

## Ecological, evolutionary & environmental sciences study design

All studies must disclose on these points even when the disclosure is negative.

|                          |                                                                                                                                      |
|--------------------------|--------------------------------------------------------------------------------------------------------------------------------------|
| Study description        | Bacterial genome data were analysed to identify co-evolving modules of genes within secondary metabolite biosynthetic gene clusters. |
| Research sample          | All the available bacterial and fungal genomic sequences from GenBank (access date 08 October 2012).                                 |
| Sampling strategy        | All biosynthetic gene clusters detected by antiSMASH were include in the analysis                                                    |
| Data collection          | antiSMASH genome annotation                                                                                                          |
| Timing and spatial scale | n.a.                                                                                                                                 |
| Data exclusions          | n.a.                                                                                                                                 |
| Reproducibility          | n.a.                                                                                                                                 |
| Randomization            | n.a.                                                                                                                                 |
| Blinding                 | n.a.                                                                                                                                 |

Did the study involve field work?     Yes     No

## Reporting for specific materials, systems and methods

We require information from authors about some types of materials, experimental systems and methods used in many studies. Here, indicate whether each material, system or method listed is relevant to your study. If you are not sure if a list item applies to your research, read the appropriate section before selecting a response.

### Materials & experimental systems

|                                     |                                                      |
|-------------------------------------|------------------------------------------------------|
| n/a                                 | Involved in the study                                |
| <input checked="" type="checkbox"/> | <input type="checkbox"/> Antibodies                  |
| <input checked="" type="checkbox"/> | <input type="checkbox"/> Eukaryotic cell lines       |
| <input checked="" type="checkbox"/> | <input type="checkbox"/> Palaeontology               |
| <input checked="" type="checkbox"/> | <input type="checkbox"/> Animals and other organisms |
| <input checked="" type="checkbox"/> | <input type="checkbox"/> Human research participants |
| <input checked="" type="checkbox"/> | <input type="checkbox"/> Clinical data               |

### Methods

|                                     |                                                 |
|-------------------------------------|-------------------------------------------------|
| n/a                                 | Involved in the study                           |
| <input checked="" type="checkbox"/> | <input type="checkbox"/> ChIP-seq               |
| <input checked="" type="checkbox"/> | <input type="checkbox"/> Flow cytometry         |
| <input checked="" type="checkbox"/> | <input type="checkbox"/> MRI-based neuroimaging |
